# Supplementary material for: Developing single nucleotide polymorphism markers for the identification of pineapple (Ananas comosus) germplasm
Source: PubMed Central journal article supplement (PMC4660223; doi:10.1038/hortres.2015.56), 2015-11-25
Supplement: hortres201556-s1.pdf [file hortres201556-s1.pdf]

**Supplementary Table S1. List of 170 *Ananas comosus* accessions in USDA/ARS pineapple collection at Hilo, Hawaii.**

| Code   | Species                                    | Name of accessions                | Code    | Species                                    | Name of accessions                          |
|--------|--------------------------------------------|-----------------------------------|---------|--------------------------------------------|---------------------------------------------|
| HANA1  | <i>A. comosus</i> var. <i>comosus</i>      | 41-411                            | HANA68  | <i>A. comosus</i> var. <i>bracteatus</i>   | CB 11                                       |
| HANA2  | <i>A. comosus</i> var. <i>comosus</i>      | 59-656                            | HANA69  | <i>A. comosus</i> var. <i>ananassoides</i> | CB 15                                       |
| HANA3  | <i>A. comosus</i> var. <i>comosus</i>      | 61-2223                           | HANA70  | <i>A. comosus</i> var. <i>bracteatus</i>   | CB 17                                       |
| HANA4  | <i>A. comosus</i> var. <i>comosus</i>      | 58-1184 (PI 536882)               | HANA71  | <i>A. comosus</i> var. <i>comosus</i>      | CB 18                                       |
| HANA6  | <i>A. comosus</i> var. <i>comosus</i>      | Tainung #9                        | HANA72  | <i>A. comosus</i> var. <i>ananassoides</i> | CB 19                                       |
| HANA7  | <i>A. comosus</i> var. <i>comosus</i>      | Cayenne Lot 520 WBC               | HANA73  | <i>A. comosus</i> var. <i>bracteatus</i>   | CB 20                                       |
| HANA8  | <i>A. comosus</i> var. <i>comosus</i>      | Cayenne Lanai                     | HANA74  | <i>A. comosus</i> var. <i>bracteatus</i>   | CB 21                                       |
| HANA10 | <i>A. comosus</i> var. <i>comosus</i>      | Cayenne Hilo                      | HANA75  | <i>A. comosus</i> var. <i>bracteatus</i>   | CB 23                                       |
| HANA11 | <i>A. comosus</i> var. <i>comosus</i>      | Columbia Variety No. 1            | HANA76  | <i>A. comosus</i> var. <i>comosus</i>      | CB 30                                       |
| HANA12 | <i>A. comosus</i> var. <i>comosus</i>      | Congo                             | HANA77  | <i>A. comosus</i> var. <i>comosus</i>      | CB 32                                       |
| HANA13 | <i>A. comosus</i> var. <i>comosus</i>      | Spanish Samoa                     | HANA78  | <i>A. comosus</i> var. <i>comosus</i>      | CB 36                                       |
| HANA14 | <i>A. comosus</i> var. <i>comosus</i>      | Pernambuco                        | HANA79  | <i>A. comosus</i> hybrid                   | F1 Hybrid Campinas                          |
| HANA15 | <i>A. comosus</i> var. <i>comosus</i>      | Ruby                              | HANA80  | <i>A. comosus</i> hybrid                   | F1 Hybrid var. <i>ananassoides</i> X Rondon |
| HANA16 | <i>A. comosus</i> var. <i>comosus</i>      | Bermuda                           | HANA81  | <i>A. comosus</i> var. <i>comosus</i>      | Rondon                                      |
| HANA17 | <i>A. comosus</i> var. <i>comosus</i>      | Natal                             | HANA82  | <i>A. comosus</i> var. <i>bracteatus</i>   | Albus                                       |
| HANA18 | <i>A. comosus</i> var. <i>comosus</i>      | Mauritius                         | HANA83  | <i>A. comosus</i> var. <i>ananassoides</i> | CB 61                                       |
| HANA19 | <i>A. comosus</i> var. <i>comosus</i>      | Sarawak                           | HANA85  | <i>A. comosus</i> var. <i>comosus</i>      | Fazenda Moura                               |
| HANA20 | <i>A. comosus</i> var. <i>bracteatus</i>   | Plot 347 (PI 56907)               | HANA86  | <i>A. comosus</i> var. <i>comosus</i>      | Jandaira                                    |
| HANA21 | <i>A. comosus</i> var. <i>comosus</i>      | Abacaxi                           | HANA87  | <i>A. comosus</i> var. <i>comosus</i>      | Rezende                                     |
| HANA22 | <i>A. comosus</i> var. <i>comosus</i>      | Santa Marta No. 1                 | HANA88  | <i>A. comosus</i> var. <i>ananassoides</i> | CB 71                                       |
| HANA23 | <i>A. comosus</i> var. <i>comosus</i>      | Sam Clarke                        | HANA90  | <i>A. comosus</i> var. <i>comosus</i>      | Prazeres                                    |
| HANA24 | <i>A. comosus</i> var. <i>comosus</i>      | Montserrat                        | HANA91  | <i>A. comosus</i> var. <i>comosus</i>      | Trinidad                                    |
| HANA25 | <i>A. comosus</i> var. <i>comosus</i>      | Macgregor                         | HANA92  | <i>A. comosus</i> var. <i>comosus</i>      | Cayenne 573                                 |
| HANA26 | <i>A. comosus</i> var. <i>comosus</i>      | Philippine Red                    | HANA93  | <i>A. comosus</i> var. <i>comosus</i>      | Cayenne 666                                 |
| HANA27 | <i>A. comosus</i> var. <i>comosus</i>      | Wild Kailua                       | HANA94  | <i>A. comosus</i> var. <i>comosus</i>      | Cayenne Clone 9                             |
| HANA28 | <i>A. comosus</i> var. <i>comosus</i>      | Dacca                             | HANA95  | <i>A. comosus</i> var. <i>comosus</i>      | Cayenne 1069                                |
| HANA29 | <i>A. comosus</i> var. <i>comosus</i>      | Sugarloaf                         | HANA96  | <i>A. comosus</i> var. <i>comosus</i>      | Cayenne 7898 QC                             |
| HANA30 | <i>A. comosus</i> var. <i>comosus</i>      | Sylhet Jaldubi                    | HANA97  | <i>A. comosus</i> var. <i>comosus</i>      | Cayenne 7898 4N                             |
| HANA31 | <i>A. comosus</i> var. <i>comosus</i>      | Black Antigua                     | HANA98  | <i>A. comosus</i> var. <i>comosus</i>      | Cayenne 45 No. 5 4N                         |
| HANA32 | <i>A. comosus</i> var. <i>comosus</i>      | Cambray                           | HANA99  | <i>A. comosus</i> var. <i>comosus</i>      | Cayenne #31 4N                              |
| HANA33 | <i>A. comosus</i> var. <i>comosus</i>      | Kendal                            | HANA100 | <i>A. comosus</i> var. <i>comosus</i>      | Cayenne #59 4N                              |
| HANA34 | <i>A. comosus</i> var. <i>comosus</i>      | Monte Lirio                       | HANA101 | <i>A. comosus</i> var. <i>comosus</i>      | Cayenne M 4W                                |
| HANA35 | <i>A. comosus</i> var. <i>comosus</i>      | Amalsad                           | HANA102 | <i>A. comosus</i> var. <i>comosus</i>      | Cayenne M 24                                |
| HANA36 | <i>A. comosus</i> var. <i>comosus</i>      | Cowboy                            | HANA103 | <i>A. comosus</i> var. <i>comosus</i>      | Cayenne M 61 Low Bloom                      |
| HANA37 | <i>A. comosus</i> var. <i>comosus</i>      | Criolla                           | HANA104 | <i>A. comosus</i> var. <i>comosus</i>      | Cayenne M 63 Plus Bloom                     |
| HANA38 | <i>A. comosus</i> var. <i>ananassoides</i> | Wild Brazil                       | HANA105 | <i>A. comosus</i> var. <i>comosus</i>      | Cayenne M 91 Big Eye                        |
| HANA39 | <i>A. comosus</i> hybrid                   | Philippine Hybrid                 | HANA106 | <i>A. comosus</i> var. <i>comosus</i>      | Cayenne M 92 Big Eye John                   |
| HANA40 | <i>A. comosus</i> var. <i>comosus</i>      | Phu Qui                           | HANA107 | <i>A. comosus</i> var. <i>comosus</i>      | Cayenne M 105 Big Eye                       |
| HANA41 | <i>A. comosus</i> var. <i>comosus</i>      | Pho Lang Tuang                    | HANA108 | <i>A. comosus</i> var. <i>comosus</i>      | Cayenne Seedy No. 24                        |
| HANA42 | <i>A. comosus</i> var. <i>comosus</i>      | Saigon Red                        | HANA110 | <i>A. comosus</i> var. <i>comosus</i>      | Cayenne M 109-5                             |
| HANA44 | <i>A. comosus</i> var. <i>comosus</i>      | Moe                               | HANA111 | <i>A. comosus</i> var. <i>comosus</i>      | Cayenne M 111 Seedy Fruit                   |
| HANA45 | <i>A. comosus</i> var. <i>comosus</i>      | Nep                               | HANA112 | <i>A. comosus</i> var. <i>comosus</i>      | Cayenne Paper Leaf                          |
| HANA46 | <i>A. comosus</i> var. <i>comosus</i>      | Sugarloaf                         | HANA114 | <i>A. comosus</i> var. <i>comosus</i>      | Cayenne Bottleneck                          |
| HANA47 | <i>A. comosus</i> var. <i>comosus</i>      | Canterra                          | HANA115 | <i>A. comosus</i> var. <i>comosus</i>      | Cayenne M 226 Nubby                         |
| HANA48 | <i>A. comosus</i> var. <i>comosus</i>      | Mexican Criolla                   | HANA116 | <i>A. comosus</i> var. <i>comosus</i>      | Cayenne CPC Big Eye                         |
| HANA49 | <i>A. comosus</i> var. <i>comosus</i>      | Pina Criolla                      | HANA117 | <i>A. comosus</i> var. <i>comosus</i>      | Cayenne M 35                                |
| HANA50 | <i>A. comosus</i> var. <i>comosus</i>      | Bogota                            | HANA118 | <i>A. comosus</i> var. <i>comosus</i>      | Acc. 253                                    |
| HANA51 | <i>A. comosus</i> var. <i>comosus</i>      | Ananas De Vaupes                  | HANA119 | <i>A. comosus</i> var. <i>comosus</i>      | Cayenne M 267 Dry Sweet                     |
| HANA52 | <i>A. comosus</i> var. <i>comosus</i>      | Papuri Vaupes Colombia            | HANA120 | <i>A. comosus</i> var. <i>comosus</i>      | Los Banos                                   |
| HANA53 | <i>A. comosus</i> var. <i>comosus</i>      | British Samoa P1                  | HANA121 | <i>A. comosus</i> var. <i>comosus</i>      | Amarillo                                    |
| HANA54 | <i>A. comosus</i> var. <i>comosus</i>      | British Samoa P5                  | HANA122 | <i>A. comosus</i> var. <i>comosus</i>      | Uhi                                         |
| HANA55 | <i>A. comosus</i> var. <i>comosus</i>      | Apaporis                          | HANA123 | <i>A. comosus</i> var. <i>comosus</i>      | Red Spanish                                 |
| HANA56 | <i>A. comosus</i> var. <i>comosus</i>      | Apaporis P1                       | HANA124 | <i>A. comosus</i> var. <i>comosus</i>      | Taboga                                      |
| HANA58 | <i>A. comosus</i> hybrid                   | Wild Brazil X Lot 520             | HANA125 | <i>A. comosus</i> var. <i>comosus</i>      | Jamaica Sugar                               |
| HANA59 | <i>A. comosus</i> hybrid                   | F1 Cayenne X <i>P. sagenarius</i> | HANA126 | <i>A. comosus</i> var. <i>comosus</i>      | Smooth Anpi                                 |
| HANA60 | <i>A. comosus</i> var. <i>comosus</i>      | Spanish Guatemala                 | HANA127 | <i>A. comosus</i> var. <i>comosus</i>      | Kohi                                        |
| HANA61 | <i>A. comosus</i> var. <i>comosus</i>      | Unknown Foreign Variety           | HANA128 | <i>A. comosus</i> var. <i>comosus</i>      | Spiny Anpi                                  |
| HANA62 | <i>A. comosus</i> var. <i>comosus</i>      | Rio Kanari                        | HANA129 | <i>A. comosus</i> var. <i>comosus</i>      | Philippine Green                            |
| HANA63 | <i>A. comosus</i> var. <i>erectifolius</i> | CB 2                              | HANA130 | <i>A. comosus</i> var. <i>comosus</i>      | Klajatan                                    |
| HANA64 | <i>A. comosus</i> var. <i>bracteatus</i>   | CB 5                              | HANA131 | <i>A. comosus</i> var. <i>comosus</i>      | Ananas Merah                                |
| HANA65 | <i>A. comosus</i> var. <i>comosus</i>      | CB 6                              | HANA132 | <i>A. comosus</i> var. <i>comosus</i>      | Cheese Pine                                 |
| HANA66 | <i>A. comosus</i> var. <i>erectifolius</i> | CB 9                              | HANA133 | <i>A. comosus</i> var. <i>comosus</i>      | Kew                                         |
| HANA67 | <i>A. comosus</i> var. <i>ananassoides</i> | CB 10                             | HANA134 | <i>A. comosus</i> var. <i>comosus</i>      | Kumta                                       |
|        |                                            |                                   | HANA136 | <i>A. comosus</i> var. <i>comosus</i>      | Spanish Criolla Red                         |
|        |                                            |                                   | HANA137 | <i>A. comosus</i> var. <i>comosus</i>      | Redonda Red Spanish                         |

| Code     | Species                               | Name of accessions            |
|----------|---------------------------------------|-------------------------------|
| HANA138  | <i>A. comosus</i> var. <i>comosus</i> | Red Spanish Pina Lisa         |
| HANA139  | <i>A. comosus</i> var. <i>comosus</i> | Cayenne Azores                |
| HANA140  | <i>A. comosus</i> var. <i>comosus</i> | Pakse                         |
| HANA142  | <i>A. comosus</i> var. <i>comosus</i> | Den                           |
| HANA143  | <i>A. comosus</i> var. <i>comosus</i> | Pina De Castilla              |
| HANA144  | <i>A. comosus</i> var. <i>comosus</i> | Manzana                       |
| HANA145  | <i>A. comosus</i> var. <i>comosus</i> | Cabezona                      |
| HANA146  | <i>A. comosus</i> var. <i>comosus</i> | Antigua                       |
| HANA147  | <i>A. comosus</i> var. <i>comosus</i> | Abacaxi Vermelho              |
| HANA148  | <i>A. comosus</i> var. <i>comosus</i> | CB 24                         |
| HANA149  | <i>A. comosus</i> var. <i>comosus</i> | CB 33                         |
| HANA150  | <i>A. comosus</i> var. <i>comosus</i> | CB 38                         |
| HANA151  | <i>A. comosus</i> var. <i>comosus</i> | CB 46                         |
| HANA153  | <i>A. comosus</i> var. <i>comosus</i> | CB 65                         |
| HANA154  | <i>A. comosus</i> var. <i>comosus</i> | CB 67                         |
| HANA155  | <i>A. comosus</i> var. <i>comosus</i> | White Jade                    |
| HANA156  | <i>A. comosus</i> var. <i>comosus</i> | 58-696 PI 536975              |
| HANA157  | <i>A. comosus</i> var. <i>comosus</i> | 63-759 PI 536976              |
| HANA158  | <i>A. comosus</i> var. <i>comosus</i> | 57-503 PI 536977              |
| HANA160  | <i>A. comosus</i> var. <i>comosus</i> | 53-116 PI 536978              |
| HANA161  | <i>A. comosus</i> var. <i>comosus</i> | 58-474 PI 536979              |
| HANA162  | <i>A. comosus</i> var. <i>comosus</i> | Cayenne John Teves            |
| HANA163  | <i>A. comosus</i> var. <i>comosus</i> | N91-05                        |
| HANA164  | <i>A. comosus</i> var. <i>comosus</i> | N91-06                        |
| HANA165  | <i>A. comosus</i> var. <i>comosus</i> | N91-13 31358                  |
| HANA166  | <i>A. comosus</i> var. <i>comosus</i> | N91-14 27280                  |
| HANA167  | <i>A. comosus</i> var. <i>comosus</i> | 32419 N91-15                  |
| HANA168  | <i>A. comosus</i> var. <i>comosus</i> | 31722 N91-16                  |
| HANA169  | <i>A. comosus</i> var. <i>comosus</i> | 32424 N91-17                  |
| HANA170  | <i>A. comosus</i> var. <i>comosus</i> | N91-34                        |
| HANA171  | <i>A. comosus</i> var. <i>comosus</i> | 75-50 N93-66                  |
| HANA172  | <i>Ananas</i> species                 | N94-92 Short Fruit #1 NGRL 33 |
| HANA173  | <i>Ananas</i> species                 | N94-92 Short Fruit #2 NGRL 33 |
| HANA174  | <i>Ananas</i> species                 | N94-92 Long Fruit #1 NGRL 33  |
| HANA175  | <i>Ananas</i> species                 | N94-92 Long Fruit #2 NGRL 33  |
| HANA176  | <i>A. comosus</i> var. <i>comosus</i> | N00-10 Dole Cayenne           |
| HANA177  | <i>A. comosus</i> var. <i>comosus</i> | N94-43 Singapore              |
| HANA178  | <i>A. comosus</i> var. <i>comosus</i> | Chimpaka                      |
| HANA179  | <i>A. comosus</i> var. <i>comosus</i> | 3621 N03-23                   |
| HANA180  | <i>A. comosus</i> var. <i>comosus</i> | 153 N03-24                    |
| HANA 185 | <i>A. comosus</i> var. <i>comosus</i> | N04-8                         |
